# Supplementary material for: Functional activity of RLIM/Rnf12 is regulated by phosphorylation-dependent nucleocytoplasmic shuttling
Source: PubMed Central journal article supplement — Mol Biol Cell. 2013 Oct 1;24(19):3085–96. doi: 10.1091/mbc.E13-05-0239 (PMC3784382; doi:10.1091/mbc.e13-05-0239), 2013-10-01
Supplement: supp_E13-05-0239_CombinedSupMats.pdf [file supp_E13-05-0239_CombinedSupMats.pdf]

# Supplemental Materials

*Molecular Biology of the Cell*

Jiao et al.

## Supplemental Figure Legends

**Figure S1 A)** HeLa cells overexpressing GFP-NESRLIM, GFP-NESRnf6 or GFP-NESHIV/Rev were treated with Leptomycin B (LMB) and stained with anti-GFP antibodies. Note increased nuclear localization of GFP fusion proteins in cells treated with LMB. **B)** Plasmids expressing GFP-RLIMNLS 205-230 with wt sequence (SSSS) and the corresponding RLIM NLS (205-230) in which serine residues at positions 212, 214, 227 and 229 have been replaced by alanine (AAAA). Transfected proteins were visualized using anti-GFP antibodies (green). Note that GFP-RLIMNLS (205-230) is expressed strictly nuclear, whereas the GFP-RLIMNLS (205-230-AAAA) protein is also localized in the cytoplasm, similar to GFP alone (compare with Fig. 2B).

## Figure S2

Specificity of the RLIM-pS214 antiserum in cross competition experiments using immunohistochemical stainings. Scale bars = 25µm. **A, B)** Stainings were performed on sections of a human microinvasive squamous cell carcinoma using A) antibodies made against the unphosphorylated RLIM (205-230) peptide (RLIM non-phospho-specific) or B) the 205-230 peptide phosphorylated at S214 (RLIM-pS214; phospho-specific). Staining reactions were competed (comp) by adding excess amounts of RLIM peptides containing the unphosphorylated NLS (RLIM-205-230) or phosphorylated at S214 (RLIM-205-230-pS214). Note that both peptides compete staining of the non-phospho-specific RLIM antibody whereas only the phospho-peptide is able to compete the staining reaction of the RLIM-pS214 antibody. **C)** Stainings on sections of normal human mammary gland using phospho-specific RLIM-pS214 antibodies. Staining reactions were competed by adding excess amounts of RLIM-205-230 or RLIM-205-230-pS214 peptides. Note that similar to B) only the phospho-peptide is able to

compete the staining reaction of the RLIM-pS214 antibody. **D)** RLIM is phosphorylated at S214 in nuclei of cells. Untreated HeLa cells were stained with antibodies directed against RLIM or with RLIM-pS214-specific antibodies. While RLIM is detected mostly nuclear using the non-phospho-specific RLIM antiserum, low levels of cytoplasmic RLIM can also be detected (compare with Fig. 1A). However, in stainings with the RLIM-pS214-specific antibodies RLIM is strictly nuclear.

### **Figure S3**

RLIM promotes cell motility in MDA-MB-231 breast cancer cells. MDA-MB-231 cells were transfected with siRNA against RLIM or control siRNA. Left panel: Motility of transfected MDA-MB-231 cells as measured in trans-well migration assays. Shown are averages  $\pm$  SEM for three independent measurements. Right panel: Representative Western blot of cell extracts. The same blot was hybridized with antibodies against RLIM and GAPDH.

### **Figure S4**

Infection of primary mammary epithelial cells with lentivirus expressing 6xMyc-tag, Myc-tagged RLIM wt (SSSS) and shuttling-deficient RLIM mutants Myc- $\Delta$ NES and Myc-SASS. Infection rates were  $> 90\%$ .

### **Figure S5**

BLAST analysis of the tandem RSRSP motifs against the Sequence data base reveals many nuclear proteins which contain tandem RSRSP motifs.

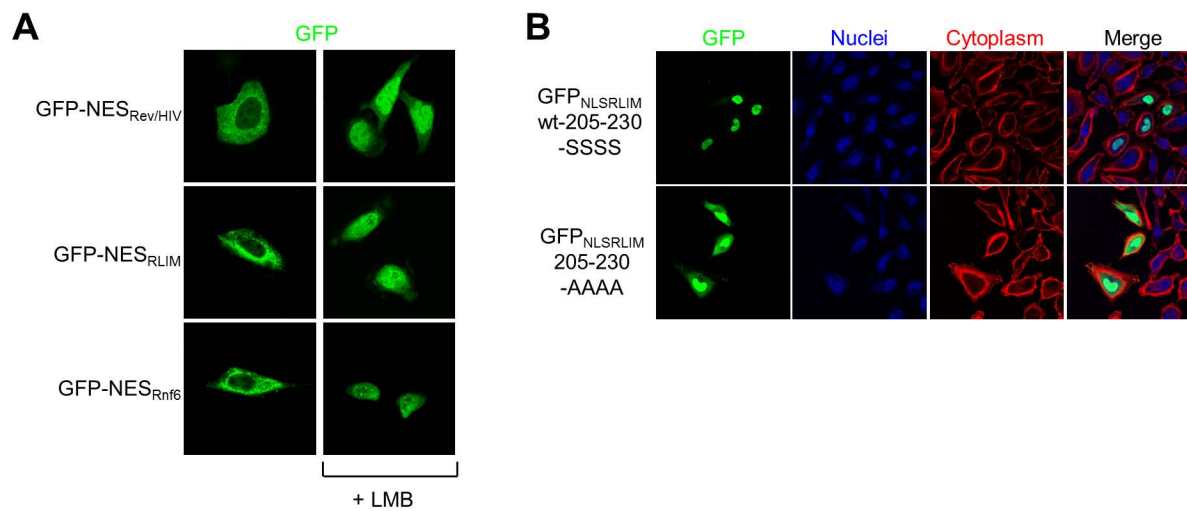

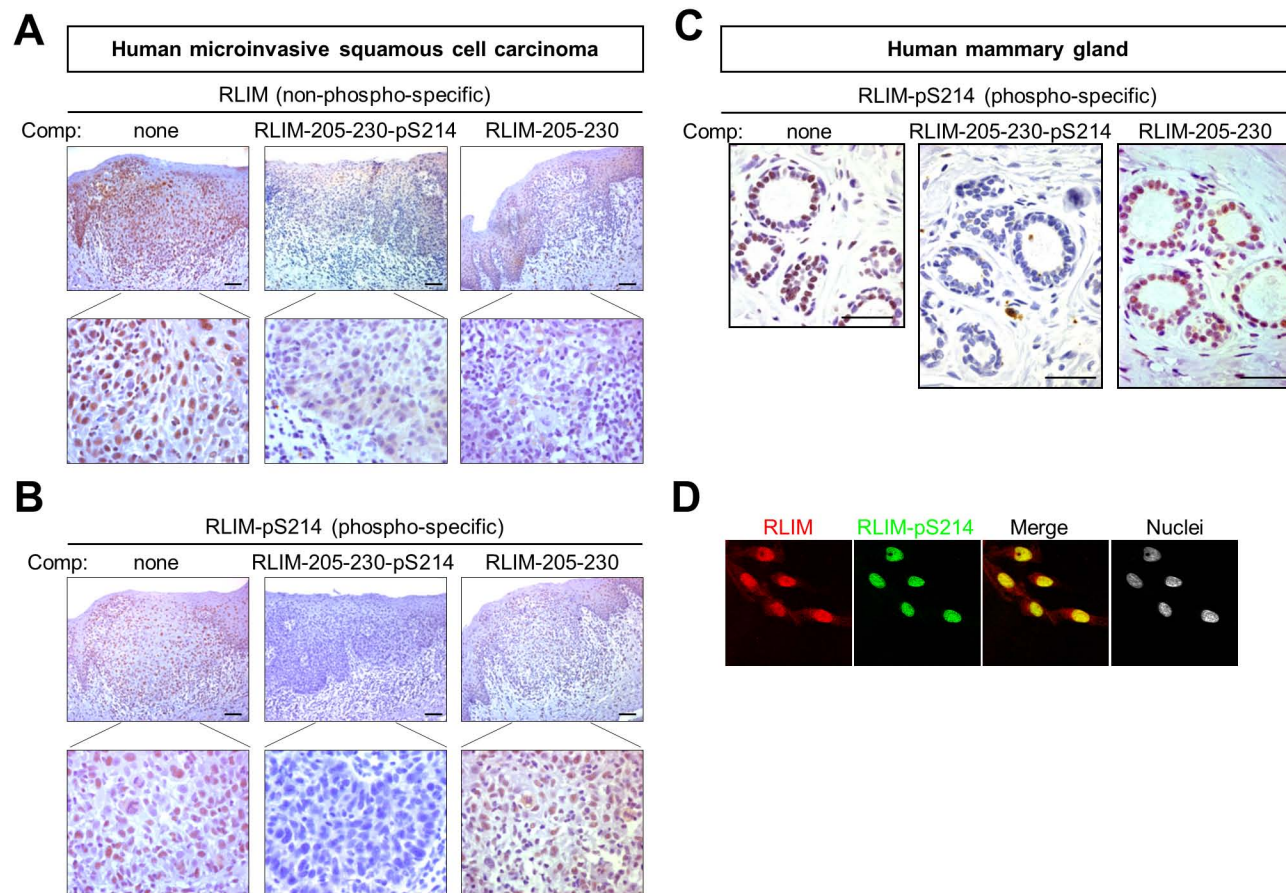

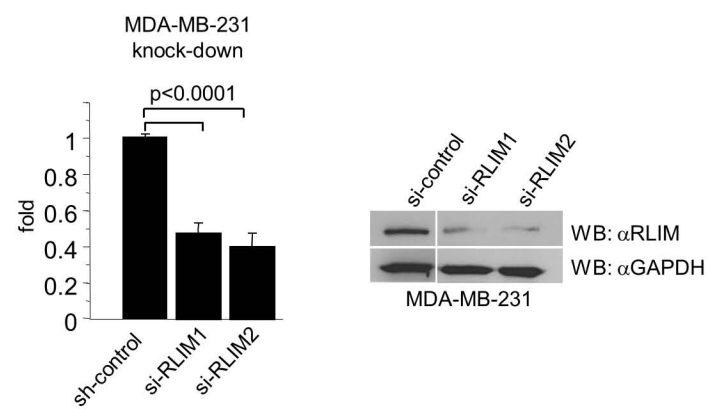

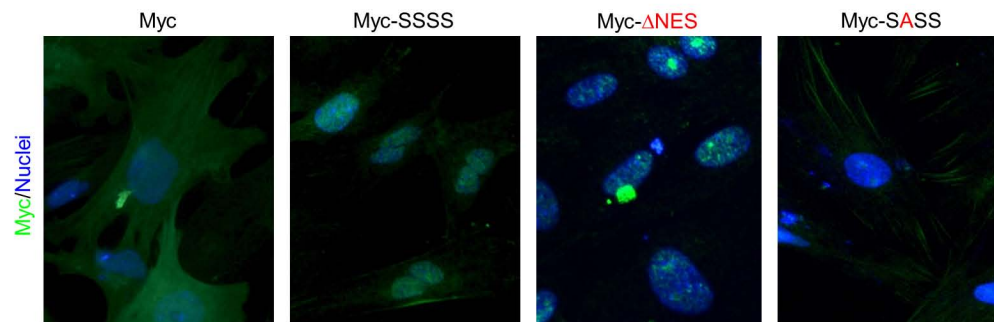

## Proteins containing tandem RSRSP motifs

| Amino Acid Sequence                                                                            | Protein (species)                                | Locus          |
|------------------------------------------------------------------------------------------------|--------------------------------------------------|----------------|
| VPPTRGQRRAR <b>RSRSP</b> DHRRTRARAE <b>RSRSP</b> LHPMSEIPRR                                    | Ubiquitin ligase RLIM/RNF12 (human)              | (NP_899196)    |
| PINRWSPTRR <b>RSRSP</b> IRRR <b>RSRSP</b> PLR <b>RSRSP</b> RRR <b>RSRSP</b> RRRRDRSRRSK        | PRP4 Pre-mRNA processing factor (mouse)          | (NP_038858)    |
| PSPYSSSSWR <b>RSRSP</b> YSPVLRRSGKS <b>RSRSP</b> YSSRHRSRS                                     | CDC2-related protein kinase 5 (human)            | (Q14004)       |
| SLASDRSYS <b>RSRSP</b> YESRSGRSYS <b>RSRSP</b> ESRFRGRSDS <b>RSRSP</b> GYELERAACK              | Pre-mRNA-splicing factor PRP45 (Y.lipolytica)    | (Q6CC77)       |
| WRRSPPMRRR <b>RSRSP</b> RRRSPVRR <b>RSRSP</b> GRRRHRSRSS                                       | Splicing related factor RNPS1 (human)            | (AAL56665)     |
| LYSRRRRARS <b>RSRSP</b> GRRRGSR <b>RSRSP</b> GRRGGGRGDG                                        | Splicing factor U2af 38kDa subunit (Drosophila)  | (Q94535)       |
| RSRSHGYHRS <b>RSRSP</b> PYRYHS <b>RSRSP</b> QAFRGQSPTK                                         | RBBP 6 Retinoblastoma-binding protein 6 (human)  | (Q7Z6E9)       |
| RRSSSGHRIR <b>RSRSP</b> VRYIYRP <b>RSRSP</b> RICHRFISKY                                        | Zinc finger protein 638 (mouse)                  | (Q61464)       |
| RSRSRERRRS <b>RSRSP</b> HRRR <b>RSRSP</b> RRHRSSSISP                                           | U4/U6.U5 tri-snRNP-associated prot 3 (X.laavis)  | (Q6GLZ8)       |
| SRRSRSSSS <b>RSRSP</b> VRESRRRSE <b>RSRSP</b> SPKRDLEKREAS <b>RSRSP</b> LPAKDRSRTTR            | RNA-binding protein srp-3 (C.elegans)            | (Q10021)       |
| QTHPPPQTLPR <b>RSRSP</b> SGQKRS <b>RSRSP</b> PHEAGFCVYLK                                       | RNA binding protein 12 (human)                   | (Q9NTZ6)       |
| KYRSRSRSRS <b>RSRSP</b> YRSNLLR <b>RSRSP</b> KSY <b>RSRSP</b> PERTSRKSVRS                      | Zinc finger protein 638 (mouse)                  | (Q61464)       |
| FSQRPQRMRS <b>RSRSP</b> FSRHRSC <b>RSRSP</b> YSRS <b>RSRSP</b> GSRSSRSRSCY                     | PPAR gamma coactivator 1-alpha (human)           | (Q9UBK2)       |
| SISRPRSSRSK <b>RSRSP</b> SPK <b>RSRSP</b> SGSPRR <b>RSRSP</b> PERMD                            | Splicing factor SFRS7 (human)                    | (Q16629)       |
| RSQSSRSKKEK <b>RSRSP</b> SKDNKRS <b>RSRSP</b> DKSRSKSKDH                                       | SFRS4 Splicing factor 4 (mouse)                  | (Q8VE97)       |
| SRTPKRSRRS <b>RSRSP</b> PKSGKRSR <b>RSRSP</b> PHRSHKSKKN                                       | U2-associated SR140 protein (human)              | (NP_001073884) |
| HSRSPRRGRS <b>RSRSP</b> KRRSVSSQ <b>RSRSP</b> RRSYRS <b>RSRSP</b> SSSS <b>RSRSP</b> YSKSPVSKRR | BCL2-associated transcription factor 1 (human)   | (AAI32781)     |
| QAYSPRRGRS <b>RSRSP</b> KRRSPSP <b>RSRSP</b> HSRNSDKSSSD                                       | Thyroid horm recept assoc prot 3 (Trap150;human) | (Q9Y2W1)       |
| KKGSDNRNGIR <b>RSRSP</b> SRAESSRRS <b>RSRSP</b> PYRQKHREVR                                     | CBF1-interacting corepressor (human)             | (Q86X95)       |
| SVRSVSRCRS <b>RSRSP</b> ICPRSQIGLNTMS <b>RSRSP</b> SPIRCGLPRF                                  | Spermatogenesis-associated protein 18 (human)    | (Q8TC71)       |
| ASRGRSGRS <b>RSRSP</b> SDKRSRGDDR <b>RSRSP</b> RDRDRRRRS                                       | Prob ATP-dependent RNA helicase DDX46 (human)    | (Q7L014)       |
| SLRRRSYRGD <b>RSRSP</b> SRSRRSYSP <b>RSRSP</b> PRKRRRHRTS                                      | Pre-mRNA-splicing factor CWC22 (Y.lipolytica)    | (Q6C8C5)       |
| SPCRRADSR <b>RSRSP</b> ERGSRRKSYRE <b>RSRSP</b> RSRERSERRGR                                    | Pre-mRNA-splicing factor CWC21 (Y.lipolytica)    | (Q6COM9)       |
| RSLDEIHPTTR <b>RSRSP</b> TRHHD <b>RSRSP</b> VDHRTDQVDS                                         | Rab3-interacting molecule 1 (RIM1; human)        | (Q86UR5)       |
| ARRDSPTYDPYK <b>RSRSP</b> SESSSESRS <b>RSRSP</b> TPGREEKITF                                    | Splicing factor 16 (human)                       | (Q8N2M8)       |
| TSFRQRKGGST <b>RSRSP</b> RRRGSR <b>RSRSP</b> GRPPKSARRS                                        | Lamin B receptor (human)                         | (NP_919424)    |
| RRPERSYQHS <b>RSRSP</b> HSSQS <b>RSRSP</b> QRLASQASRP                                          | Mx2-interact prot (SMART/HDAC1 assoc prot;mouse) | (Q62504)       |
| RIPKNIQNDKE <b>RSRSP</b> ALYGRNARS <b>RSRSP</b> DRGKSAEPQH                                     | Histone methyl transferase SET2 (D.hansenii)     | (Q6BM04)       |
| EDDAEKNEER <b>RSRSP</b> SVDSRQSGSYLDAECRHRRD <b>RSRSP</b> HKRKRNDKDKD                          | U11/U12 snRNP 48kDa protein (human)              | (Q6IEG0)       |
